# Supplementary material for: Evidence suggestive of Cauliflower mosaic virus transcribing complementary DNA from Cucumber mosaic virus RNA in mixed infection
Source: Research Square preprint supplement (doi:10.21203/rs.3.rs-7599836/v1), 2025-10-31
Supplement: Supplementary file 1 [file 6c2e6439a82b8bcf5022d96b.pdf]

## Supplementary Information

Evidence suggestive of *Cauliflower mosaic virus* transcribing complementary DNA from *Cucumber mosaic virus* RNA in mixed infection

Hakimeh Ighani Mayan<sup>a</sup>, Nemat Sokhandan Bashir<sup>b,\*</sup>, Davoud Koolivand<sup>c</sup>

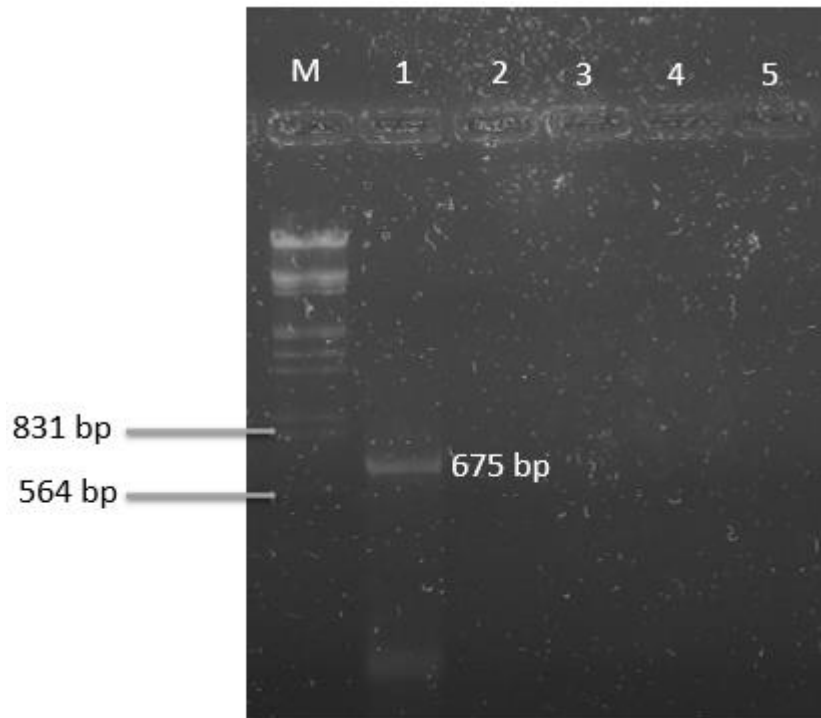

Fig. S1 Electrophoresis patterns of PCR product with CMV CP specific primers in 1% agarose gel from plants with CMV-infected; Lane M: 1 ng Lambda DNA *EcoRI* + *HindIII*, Lane 1: RT-PCR on the boiled dsRNA, Lanes 2, 3, 4, and 5: PCR on the boiled dsRNA extracted from four cauliflower plants with single CMV-infection.

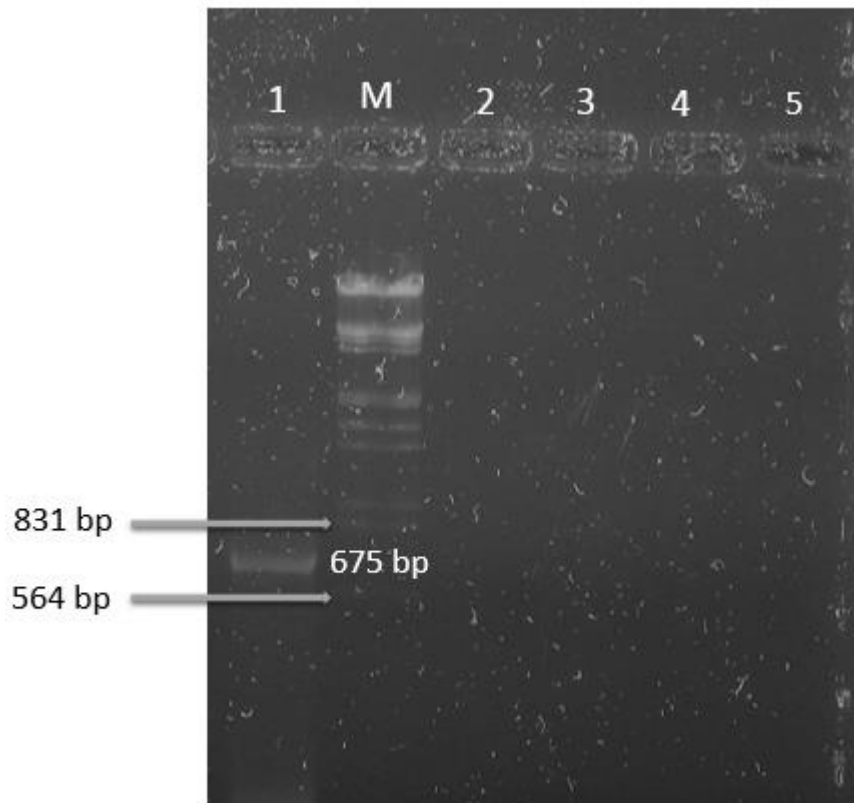

Fig. S2 Electrophoresis in 1% agarose gel of products from PCR with CMV CP specific primers from plants with CMV-infection; Lane M: 1 ng Lambda DNA *EcoRI* + *HindIII*, Lane 1: Positive control (plasmid containing CMV CP gene), Lanes 2, 3, 4, and 5: PCR on the total DNA extracted from four cauliflower plants with single CMV-infection
